# Supplementary material for: Systematically fragmented genes in a multipartite mitochondrial genome
Source: PubMed Central journal article supplement — Nucleic Acids Res. 2010 Oct 8;39(3):979–88. doi: 10.1093/nar/gkq883 (PMC3035467; doi:10.1093/nar/gkq883), 2010-10-08
Supplement: supp_gkq883_suppl-tables_figs_2010sep17.pdf [file supp_gkq883_suppl-tables_figs_2010sep17.pdf]

## **SUPPLEMENTAL MATERIAL**

### **TABLES**

**[Supplemental Table 1.](#) Primers used for DNA sequencing, PCR, and RT-PCR**

**[Supplemental Table 2.](#) Protein and taxon sampling used to generate HMMs**

**[Supplemental Table 3.](#) Sequence comparison of A-class and B-class chromosomes**

**[Supplemental Table 4.](#) Codon usage of *D. papillatum* mitochondrial genes**

### **FIGURE LEGENDS**

### **REFERENCES**

### **FIGURES**

**[Supplemental Figure 1.](#) Sequence repeats within chromosomes A3207 (A) and B3209 (B)**

**[Supplemental Figure 2.](#) GC-skew of chromosomes A3207 (A) and B3209 (B)**

**[Supplemental Figure 3.](#) Multiple protein alignment of Nad8**

**Supplemental Table 1. Primers used for DNA sequencing, PCR, and RT-PCR**

| Name  | Sequence                      | Used for                           |
|-------|-------------------------------|------------------------------------|
| dp1   | GCTGTTGATGCTCAGCAGAGCGGT      | Primer walking, chromosome A and B |
| dp2   | GCACTCGCTGTGGAGTGCGTGTAT      | Primer walking, chromosome A and B |
| dp3   | GATAGCATACCATCTACCGTCTACA     | Primer walking, chromosome A       |
| dp4   | GCTCTGCTGCTCCGCTGCACAGTG      | Primer walking, chromosome A       |
| dp5   | CCTCTACACGTAGTAGATGCATATC     | Primer walking, chromosome A       |
| dp6   | GTAGTGCTACGAGGAGCGGTAGAT      | Primer walking, chromosome A       |
| dp7   | GCTGTAGAGCTACGTGCTGCTACAT     | Primer walking, chromosome B       |
| dp8   | CGTGCATCCATGCACAGCCGGTC       | Primer walking, chromosome B       |
| dp11  | GGTAGATGGACGGTATGCCTA         | Primer walking, chromosome B       |
| dp15  | GCATCTACATCCTACCCTCTACGT      | Primer walking, chromosome B       |
| dp17  | CCGCTCTGCTGAGCATCAACAGC       | Primer walking, chromosome A and B |
| dp18  | ATACACGCACTCCACAGCGAGTGC      | Primer walking, chromosome A       |
| dp19  | GCTACATGCTATCCTCTCCCGTAG      | Primer walking, chromosome B       |
| dp20  | GCACCACAGGATGCTAGTACATGTACAGC | Primer walking, chromosome B       |
| dp21  | GCGGTGTATTGGTACTAGCAGTACGGCGT | Primer walking, chromosome B       |
| dp22  | GGGATATGCACAGGGAATGCA         | Primer walking, chromosome A and B |
| dp40  | CGTAGCAGCAGCACGTAGTGTATGCA    | Primer walking, chromosome A       |
| dp44  | GGGTACAGATCCACTTGGGA          | Primer walking, chromosome A       |
| dp45  | GCGTAGTAAGGTAATGGTAT          | Primer walking, chromosome A       |
| dp63  | GCTAGTACCACCTCGTAGCATG        | Primer walking, chromosome B       |
| dp64  | GGCATCAACGCACCTGTGCAT         | Primer walking, chromosome A       |
| dp26  | GGTCTTCGGGCACCCAGAG           | PCR of <i>cox1</i>                 |
| dp27  | TACCCTACGTACACGTGCAC          | PCR of <i>cox1</i>                 |
| dp38  | GACTACCAGTATACCACAGG          | PCR of <i>cox1</i>                 |
| dp39  | AGCATCCATGCATCTGGAGG          | PCR of <i>cox1</i>                 |
| dp47  | CATGATGGGTGTTGCCTTCC          | PCR of <i>cob</i>                  |
| dp50  | GCTGTAACCCATCCACTAACGT        | PCR of <i>cob</i>                  |
| dp59  | CACGTTGTGGCCAACCAAGTG         | PCR of <i>cox2</i>                 |
| dp62  | CCGTACAGGGTGCCAGTAACG         | PCR of <i>cox2</i>                 |
| dp76  | GCCATCCACTAGCAGCCATGCTAC      | RT-PCR of <i>cox1</i>              |
| dp87  | AAGAGCATGAGGATGCCATGC         | RT-PCR of <i>cox1</i>              |
| dp90  | GCTGATGTGCAGCTCTCCCTTTGG A    | PCR of <i>nad7</i>                 |
| dp91  | GAGTGCCTCCTGCAGACCTAGGA       | PCR of <i>nad7</i>                 |
| dp93  | CTGGTGCTAGCTGAGACCTTAGG       | PCR of <i>nad7</i>                 |
| dp94  | CGCTCCGGAGTAGGACACCAGATG      | PCR and RT-PCR of <i>nad7</i>      |
| dp98  | CCTGTACAGAGCTACTGCAGC         | PCR of <i>nad7</i>                 |
| dp100 | CCAGTGTAGTGCTCCGGAT           | RT-PCR of <i>nad7</i>              |

**Supplemental Table 2. Protein and taxon sampling used to generate HMMs**

|          |                                                                                                                                                                                                                                                                                                                                                                                                                                                                                                                                                                                                                                                                                                                                                                                                                                                                                                                                                                            |
|----------|----------------------------------------------------------------------------------------------------------------------------------------------------------------------------------------------------------------------------------------------------------------------------------------------------------------------------------------------------------------------------------------------------------------------------------------------------------------------------------------------------------------------------------------------------------------------------------------------------------------------------------------------------------------------------------------------------------------------------------------------------------------------------------------------------------------------------------------------------------------------------------------------------------------------------------------------------------------------------|
| Proteins | <i>atp1, atp6, atp8, atp9, cob, cox1-3, nad1-4, nad4L, nad5-11, rps12, sdh1, sdh2</i>                                                                                                                                                                                                                                                                                                                                                                                                                                                                                                                                                                                                                                                                                                                                                                                                                                                                                      |
| Taxa     | <i>Adriamonas vulgaris, Allomyces macrogynus, Amastigamonas bermudensis, Amastigamonas sp., Andalucia godoyi, Bigelowiella natans, Capsaspora owcarzaki, Paracercomonas marina, Chaetosphaeridium globosum, Chara vulgaris, Chondrus crispus, Chrysodidymus synuroideus, Compsopogon caeruleus, Cyanidioschyzon merolae, Cyanophora paradoxa, Desmarestia viridis, Emiliana huxleyi, Geodia neptuni, Glaucocystis nostochinearum, Guillardia theta, Histiona ariudes, Jakoba bahamensis, Jakoba libera, Klebsormidium flaccidum, Malawimonas californiana, Malawi jakobiformis, Marchantia polymorpha, Mesostigma viride, Monosiga brevicollis, Naegleria gruberi, Nephroselmis ovilacea, Nuclearia sp., Ochromonas danica, Ostreococcus lucimarinus, Pavlova lutheri, Physcomitrella patens, Phytophthora infestans, Porphyra purpurea, Prototheca, Reclinomonas americana NZ, Rhodomonas, Rhizopus, Saprolegnia, Seculamonas ecuadoriensis, Thalassiosira pseudonana</i> |

**Supplemental Table 3. Sequence comparison of A-class and B-class chromosomes**

| Chromosomes<br>(size)                                      | Gene module<br>contained in<br>chromosomes | Length of        |                                          | substitutions         | Number of                                |                             |
|------------------------------------------------------------|--------------------------------------------|------------------|------------------------------------------|-----------------------|------------------------------------------|-----------------------------|
|                                                            |                                            | cassette         | constant<br>region<br>(shared<br>length) |                       | indels<br>(length)                       | overall nt<br>differences   |
| A3207 (5,852 bp)<br>vs<br>A3208 (5,802 bp)                 | <i>cox1</i> -m9                            | 311 bp           | 5,541 bp                                 | 63                    | 5 (1-48 bp)                              | 2.0 %                       |
| A3207 (5,852 bp)<br>vs<br>A4001 (5,794 bp)                 | <i>cox1</i> -m9<br><i>nad7</i> -m6         | 311 bp<br>295 bp | 5,541 bp<br>5,794 bp<br>(100%)           | 71 <sup>a</sup>       | 28 (1-48 bp) <sup>a</sup>                | 3.3 % <sup>a</sup>          |
| B3209-population<br>(7,182 bp) <sup>b</sup><br>vs<br>A3207 | <i>cox1</i> -m4<br><i>cox1</i> -m9         | 310 bp<br>/      | 6,872 bp<br>(41%;<br>2.57<br>kbp)        | 54<br>44 <sup>c</sup> | 2 (1-50 bp)<br>13 (1-12 bp) <sup>c</sup> | 1.8 %<br>3.2 % <sup>c</sup> |
| B3209-population                                           | <i>cox1</i> -m4                            |                  |                                          |                       |                                          |                             |

<sup>a</sup> The cassette regions were not included in the comparison

<sup>b</sup> Average length. The population was sequenced collectively, see Methods.

<sup>c</sup> Numbers refer to shared regions only.

**Supplemental Table 4.** Codon frequency of *D. papillatum* mitochondrial genes<sup>a</sup>

|   |     |      |   |     |      |   |     |      |   |     |      |
|---|-----|------|---|-----|------|---|-----|------|---|-----|------|
| F | TTT | 5.3  | S | TCT | 5.8  | Y | TAT | 16.3 | C | TGT | 37.5 |
| F | TTC | 94.7 | S | TCC | 27.7 | Y | TAC | 83.8 | C | TGC | 62.5 |
| L | TTA | 2.3  | S | TCA | 9.5  | * | TAA | 66.7 | W | TGA | 31.1 |
| L | TTG | 4.9  | S | TCG | 3.6  | * | TAG | 33.3 | W | TGG | 68.9 |
| L | CTT | 2.3  | P | CCT | 32.7 | H | CAT | 38.8 | R | CGT | 26.0 |
| L | CTC | 24.9 | P | CCC | 16.3 | H | CAC | 61.3 | R | CGC | 10.0 |
| L | CTA | 30.2 | P | CCA | 34.7 | Q | CAA | 2.8  | R | CGA | 4.0  |
| L | CTG | 35.5 | P | CCG | 16.3 | Q | CAG | 97.2 | R | CGG | 20.0 |
| I | ATT | 0.0  | T | ACT | 15.9 | N | AAT | 10.7 | S | AGT | 11.7 |
| I | ATC | 50.9 | T | ACC | 31.9 | N | AAC | 89.3 | S | AGC | 41.6 |
| I | ATA | 49.1 | T | ACA | 34.5 | K | AAA | 8.3  | R | AGA | 8.0  |
| M | ATG | 100  | T | ACG | 17.7 | K | AAG | 91.7 | R | AGG | 32.0 |
| V | GTT | 4.3  | A | GCT | 30.7 | D | GAT | 30.8 | G | GGT | 37.8 |
| V | GTC | 25.5 | A | GCC | 21.3 | D | GAC | 69.2 | G | GGC | 21.0 |
| V | GTA | 26.8 | A | GCA | 38.0 | E | GAA | 11.4 | G | GGA | 25.9 |
| V | GTG | 43.3 | A | GCG | 10.0 | E | GAG | 88.6 | G | GGG | 15.4 |

<sup>a</sup>Codon frequencies in % from *cob*, *cox1*, *cox2*, *cox3*, *nad7*. Shaded codons are underrepresented.

## FIGURE LEGENDS

**Supplemental Figure 1.** Sequence repeats within chromosomes A3207 (A) and B3209 (B). Positive diagonals indicate direct repeats. The dotplot was generated with Dotter v3.1 (<http://www.cgb.ki.se/cgb/groups/sonnhammer/Dotter.html>) (1), using default parameters.

**Supplemental Figure 2.** GC-skew of chromosomes A3207 (A) and B3209 (B). The cumulative value of (G-C)/(G+C) is plotted along the sequence. The graph was generated using the University of Pittsburgh bioinformatics software and web tools collection at the URL <http://bioinformatics2.pitt.edu/index.html>. Window size was 300. The origin of replication is generally associated with the global minimum of the cumulative GC skew (2).

**Supplemental Figure 3.** Multiple protein alignment of Nad8. The protein regions best conserved across reference proteins are boxed. The predicted partial sequence from *D. papillatum* (labeled *Dipl.papi.*) has been constructed from the conceptual translation of two genomic cassettes, cassetteA67 and cassetteB44. Modules could not be precisely mapped within the cassettes, because the corresponding cDNA sequence is missing from our dataset. A third - the terminal - module indicated by x remains to be identified. Lowercase letters, protein sequence likely not corresponding to modules, but rather to module-flanking regions. Mitochondrion-encoded Nad8 protein sequences and GenBank acc. nos. (protein) are: *Rhod.sali.*, *Rhodomonas salina* (10444172); *Recli.amer*, *Reclinomonas americana* (11466496); *Tryp.bruc.*, *Trypanosoma brucei* (552291).

## REFERENCES

1. Sonnhammer, E.L. and Durbin, R. (1995) A dot-matrix program with dynamic threshold control suited for genomic DNA and protein sequence analysis. *Gene*, **167**, GC1-10.
2. Lobry, J.R. (1996) Asymmetric substitution patterns in the two DNA strands of bacteria. *Mol Biol Evol*, **13**, 660-665.

# Supplemental Figure 1A

A3207 vs A3207

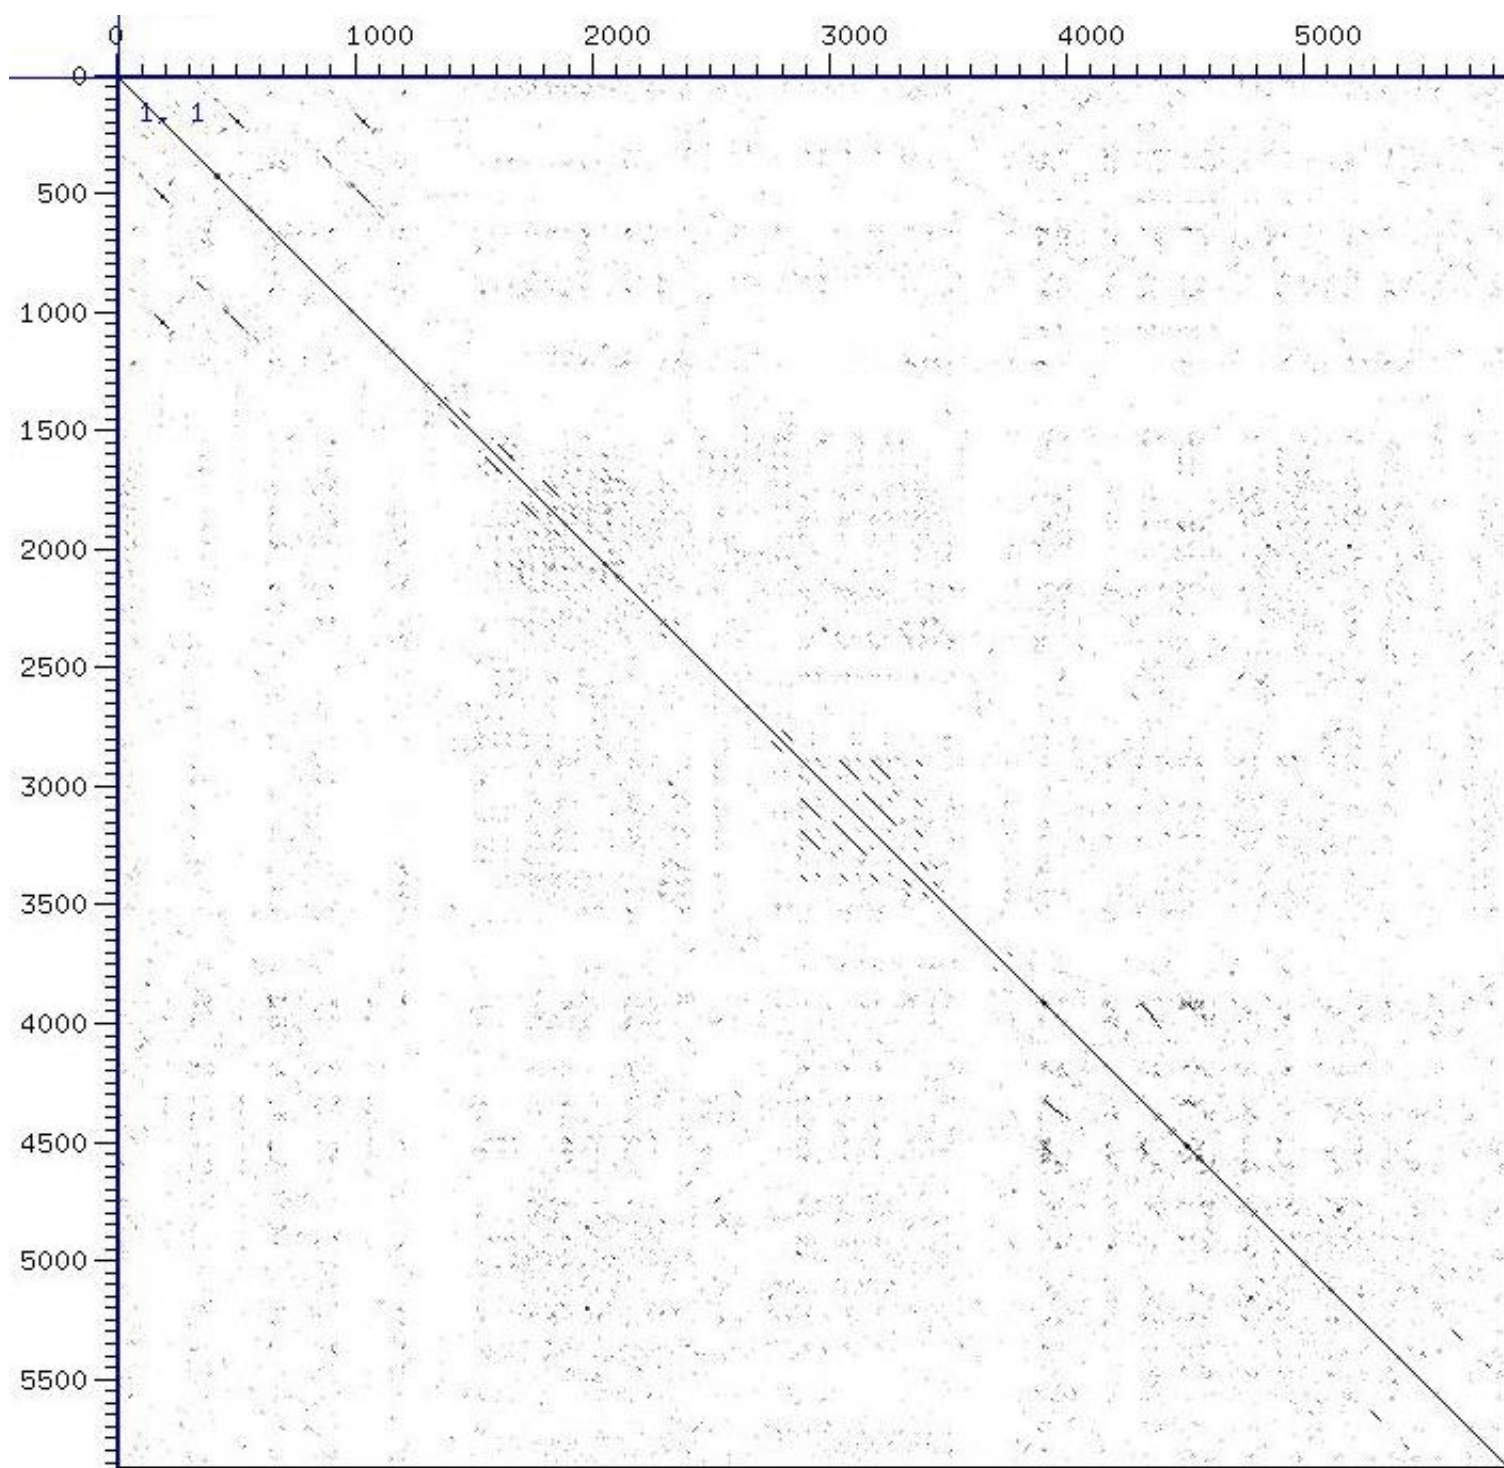

# Supplemental Figure 1B

B3209 vs B3209

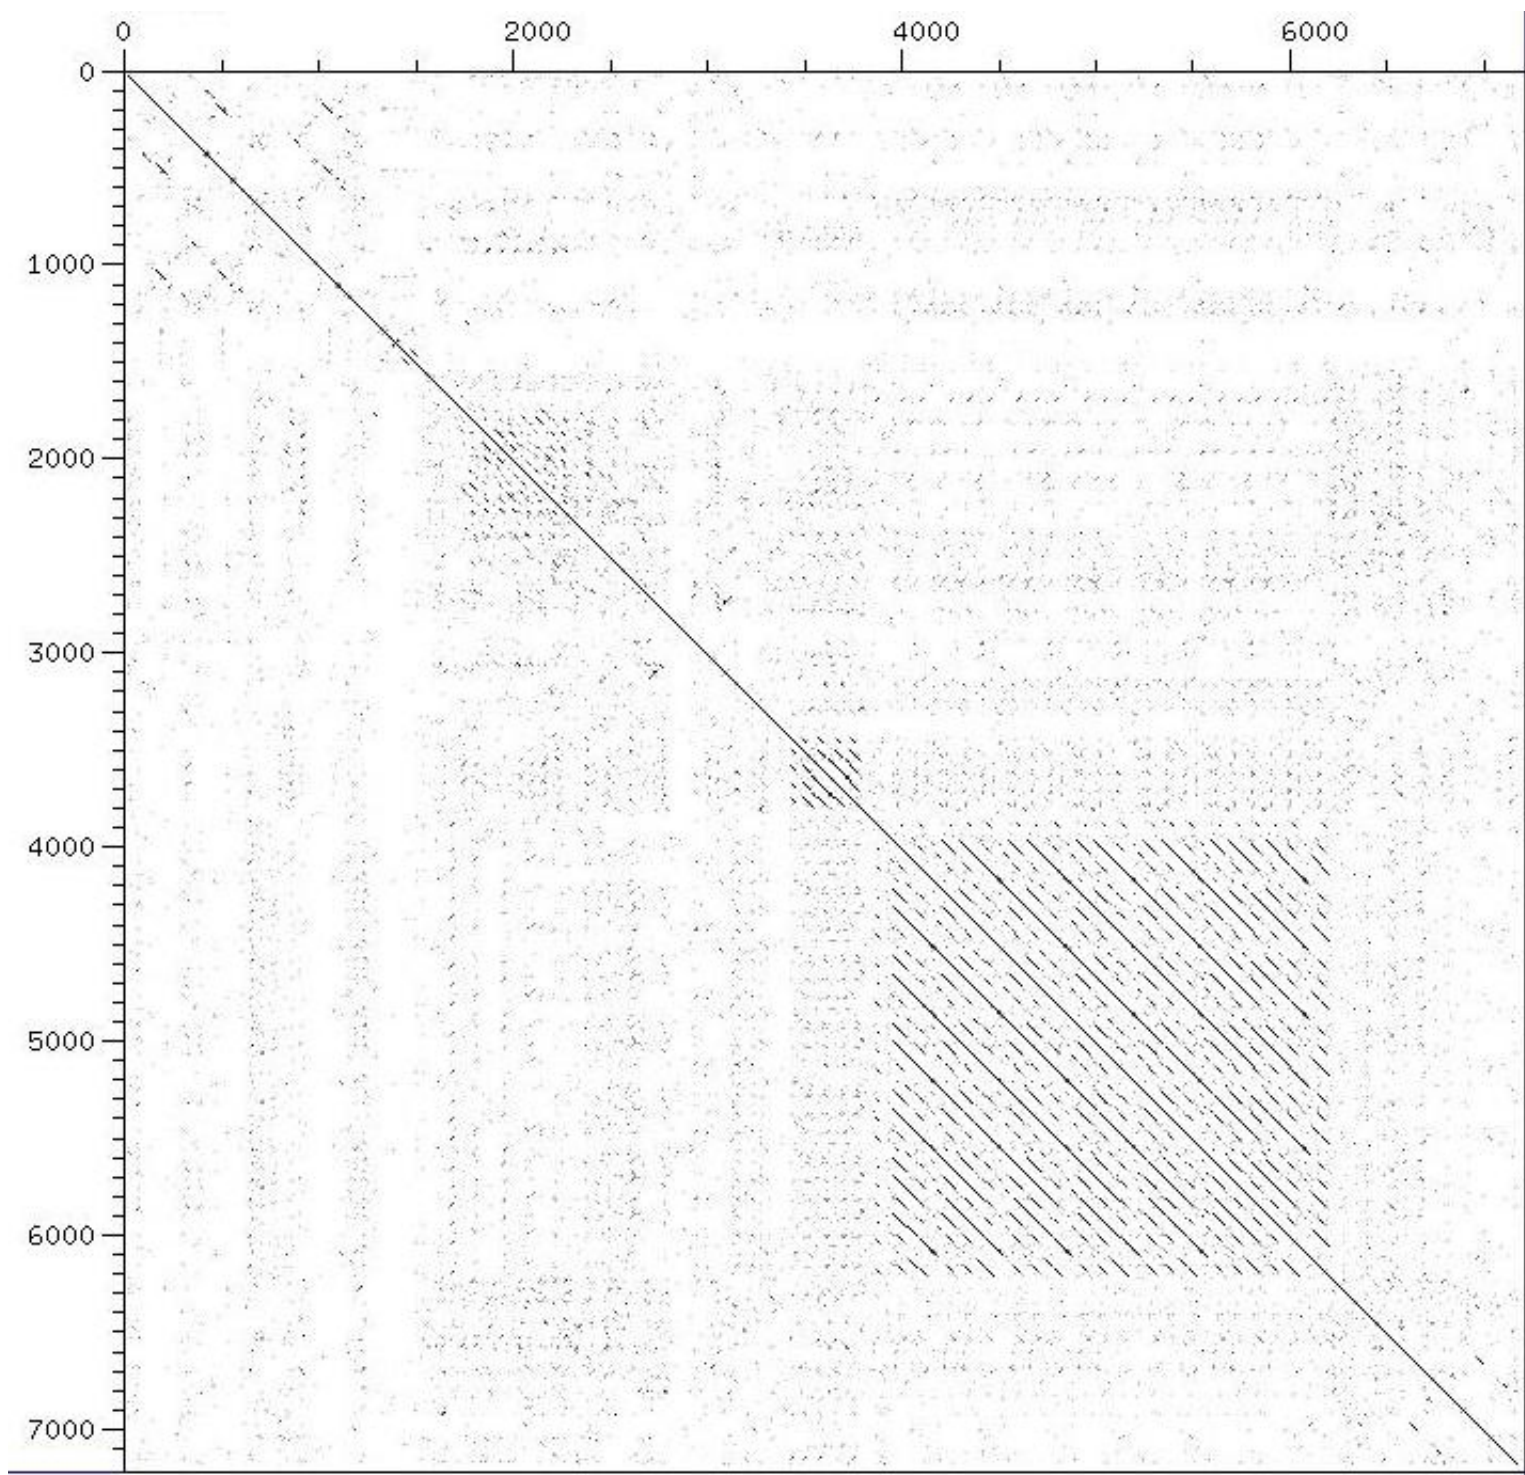

# Supplemental Figure 2

**A**

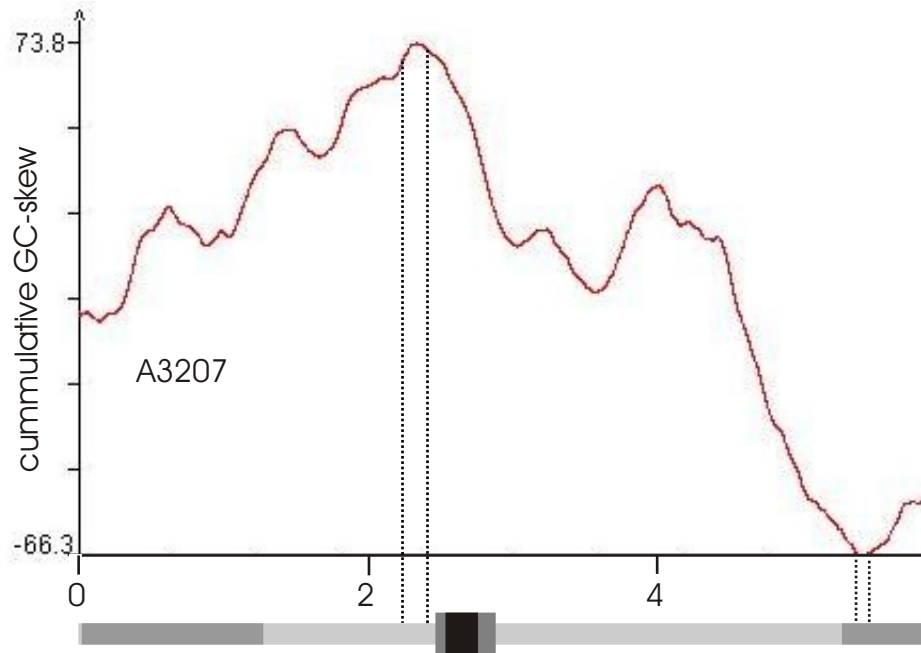

**B**

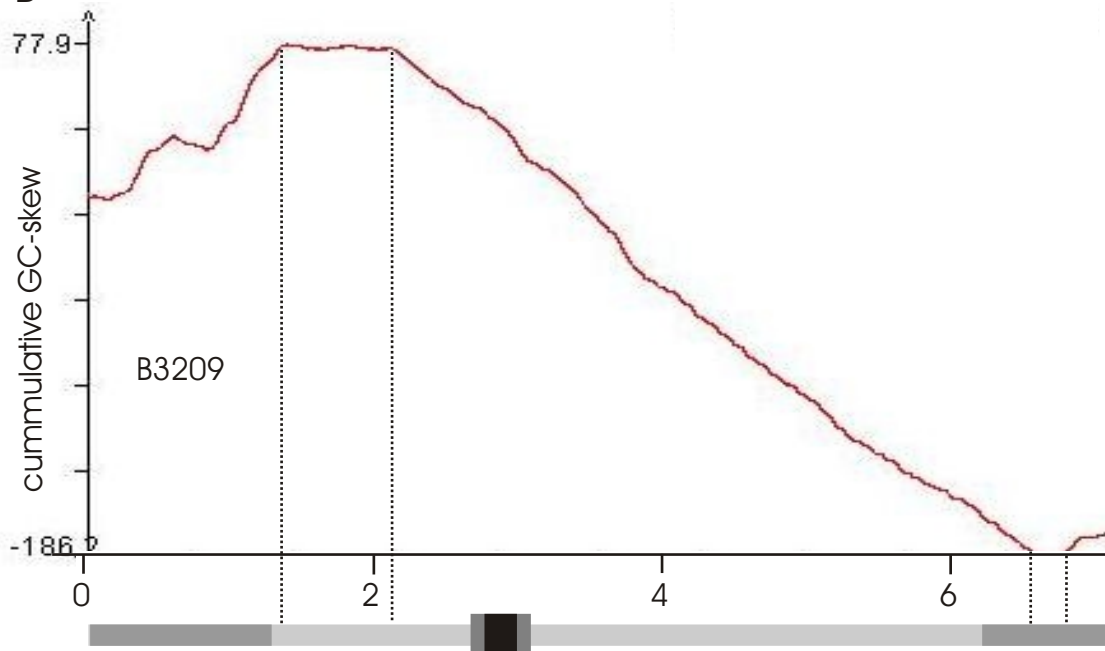



# Supplemental Figure 3

|             |                                                  |       |          |    |            |              |                              |
|-------------|--------------------------------------------------|-------|----------|----|------------|--------------|------------------------------|
|             | 1                                                | 11    | 21       | 31 | 41         | 51           | 60                           |
| Rhod.sali.  |                                                  |       |          |    |            |              |                              |
|             | MSYFNFNVRILFLSELFRGLWMVLQYFFRRKVTLNYPFEKAVLSPRFR |       |          |    |            | RGEHALRRYFSG |                              |
| Recl.amer.  | MTIINKTAQTLFLTELVKGMSLTLDYFFRKKVTLNYPFEKGPLSPRFR |       |          |    |            | RGEHALRRYQTG |                              |
| Naeg.grub.  | MFSSFQYLYLSELMRGLFVALKNLFSKKVTINYPFEKGAI SPRFR   |       |          |    |            | RGEHALRRYSNG |                              |
| Tryp.bruc.  | MF                                               | FFDFL | FFFFVCFY | MC | FVCCVTICLP | IELTIVSLLV   | RGNHFLRFYWCG                 |
| Dipl.papi.  | VQYSWWCTGLYMEYVVTLSCVLVYHASRSVLLTE               |       |          |    |            |              | -VPASHWHRGEHILACHADG         |
| cassetteA67 | rssccvVQYSWWCTGLYMEYVVTLSCVLVYHASRSVLLTE         |       |          |    |            |              | -VPASHWHRGEHILACHADG         |
| cassetteB44 |                                                  |       |          |    |            |              | qhptsyqqlvpprsmwqyawcctachvv |

|             |                            |    |             |          |                  |        |        |
|-------------|----------------------------|----|-------------|----------|------------------|--------|--------|
|             | 61                         | 71 | 81          | 91       | 101              | 111    | 120    |
| Rhod.sali.  |                            |    |             |          |                  |        |        |
|             | EERICIACKLCEAVCPAQAITIE    |    | ETESRADN    | SRKTSRYD | IDMTKCIFCGLCQE   | EACP   | VDAIVE |
| Recl.amer.  | EERICIACKLCEAICPAQAITIE    |    | ESEPRIDG    | SRRTTRYD | IDMTKCIYCGFCQE   | EACP   | VDAIVE |
| Naeg.grub.  | EERICIACKLCEVVPALAITID     |    | SAQQLN      | SRQTTRYD | IDMTKCIYCGLCQE   | EACP   | VDAIVE |
| Tryp.bruc.  | LERCIACRLCDLICPSLALDVRVGSF |    | GGHRFADWF   | TLSYRRCI | YCGFCMHVCPTDAITH |        |        |
| Dipl.papi.  | DPRCIACRLCSVACPAYAITVLAGIA |    | STGSRTPAEYV | LCTTRCI  | YCGWCDAVCP       | THATIH |        |
| cassetteA67 | DPRCIAaehhl*               |    |             |          |                  |        |        |
| cassetteB44 | rpsgstCRLCSVACPAYAITVLAGIA |    | STGSRTPAEYV | LCTTRCI  | YCGWCDAVCP       | THATIH |        |

|             |                                               |     |     |     |     |
|-------------|-----------------------------------------------|-----|-----|-----|-----|
|             | 121                                           | 131 | 141 | 151 | 163 |
| Rhod.sali.  |                                               |     |     |     |     |
|             | GPNYEYSVFKRQNLINKEKLLKNGDQWELEIRENRLSESMYR*   |     |     |     |     |
| Recl.amer.  | GPNFEFATETHEELLYDKEKLLQNGDRWETEIAANLANEALYR*  |     |     |     |     |
| Naeg.grub.  | SFNFEYSTFTHDELLYDKKLLLANGDKFEIEIYLNKKEILYR*   |     |     |     |     |
| Tryp.bruc.  | SLFVMCFCLAMYLL-APKFLFLFGCCFMLDFYLCFV*         |     |     |     |     |
| Dipl.papi.  | SVVLYCTGSTASTTLYxxxxxxxxxxxxxxxxxxxxxxxxxxxx* |     |     |     |     |
| cassetteB44 | SVVLYCTGSTASTTLYlptraryti*                    |     |     |     |     |
